# Supplementary material
Source: ML conference proceedings conference paper supplement (https://proceedings.mlr.press/v97/schroeter19a.html)
Supplement: Supplementary file 1 [file schroeter19a-supp.pdf]

**Supplementary material: Piano Onset Detection**

The following figures illustrate the performance of our *weakly*-supervised piano onset detection model on two different short piano extracts. Our approach achieves localization *without any localization prior* — using only *occurrence counts* for training.

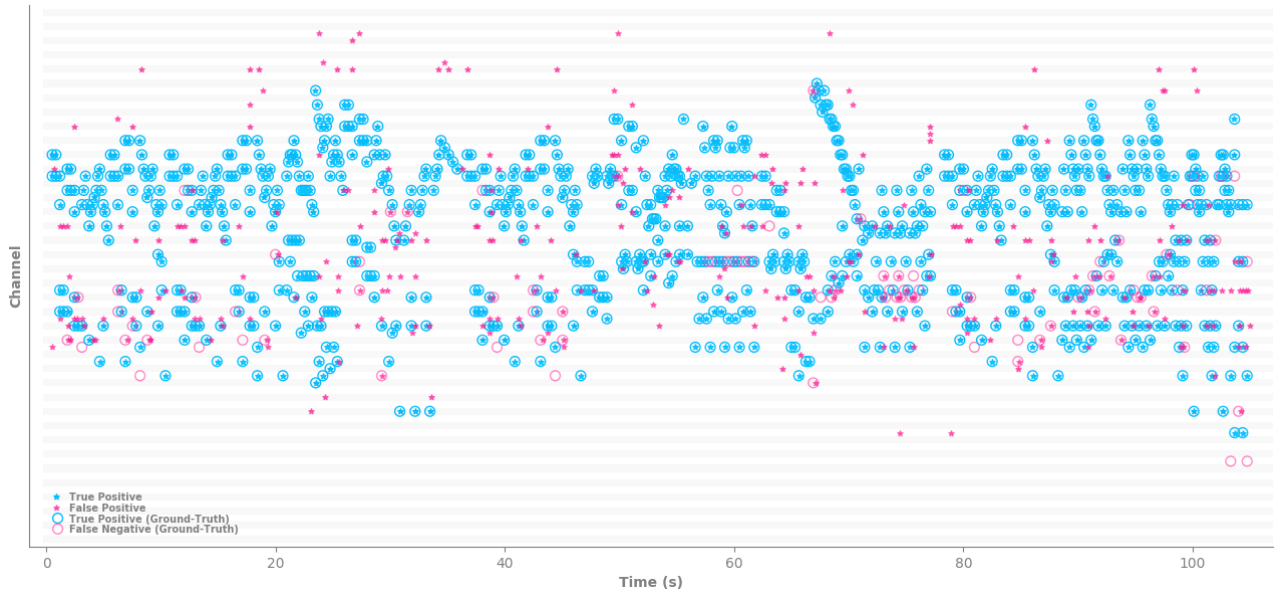

Figure 1. Mozart - Piano Sonata in C major ('Sonata semplice') K. 545 - 3rd Movement Rondo (Allegretto)

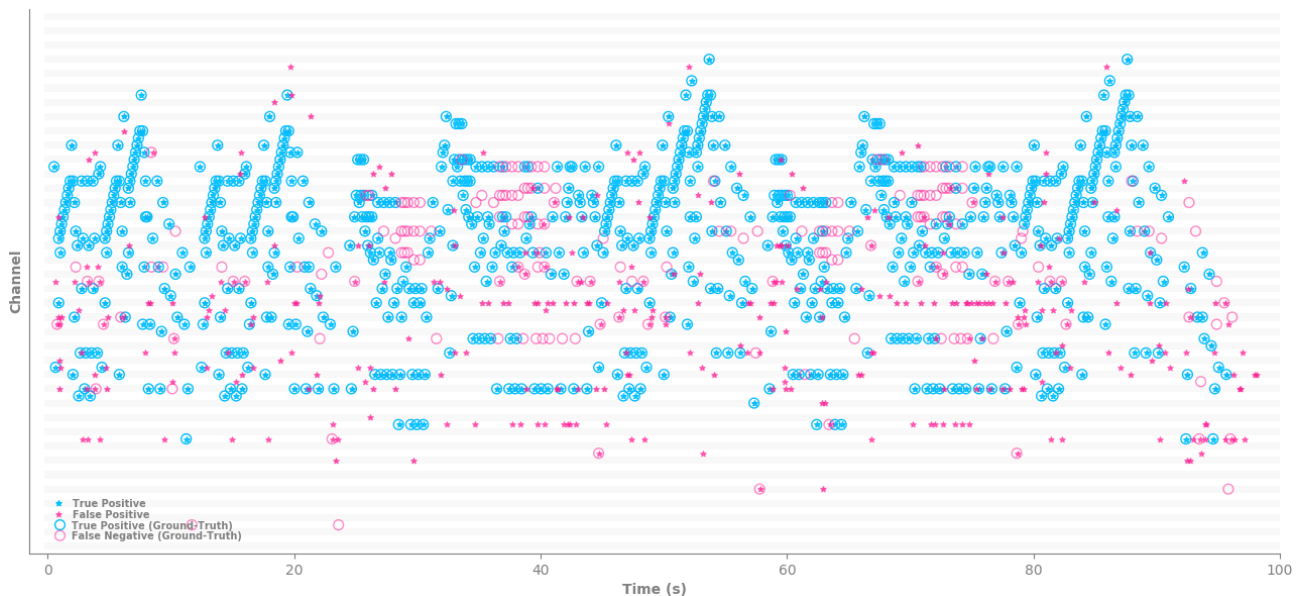

Figure 2. Grieg - Lyric Pieces Book III, Opus 43 - No. 1 Butterfly
